# Supplementary material for: miR-31-5p Promotes Oxidative Stress and Vascular Smooth Muscle Cell Migration in Spontaneously Hypertensive Rats via Inhibiting FNDC5 Expression
Source: MDPI journal article supplement (doi:10.3390/biomedicines9081009), 2021-08-13
Supplement: s1 [file s1]

# Online supplemental figure

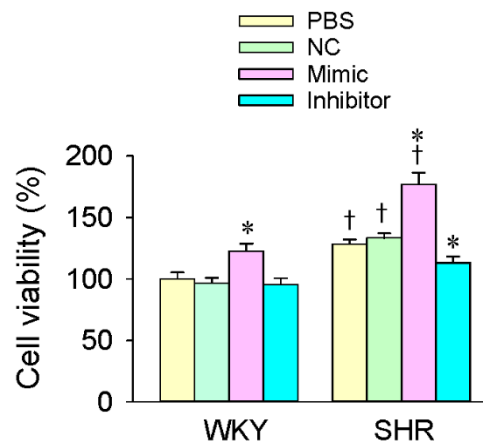

Figure S1 Effects of miR-31-5p mimic and inhibitor on VSMC viability of WKY and SHR. The measurements were made after the treatment with PBS, normal control (NC, 50 nmol/L), miR-31-5p mimic (50 nmol/L) or miR-31-5p inhibitor (100 nmol/L) for 24 h. The cell viability was measured with CCK-8 kits. Values are mean $\pm$ SE. \*P<0.05 vs. PBS or NC; †P<0.05 vs. WKY. n=6 per group.
